# Supplementary material for: Controlled and Local Delivery of Antibiotics by 3D Core/Shell Printed Hydrogel Scaffolds to Treat Soft Tissue Infections
Source: MDPI journal article supplement (doi:10.3390/pharmaceutics13122151), 2021-12-14
Supplement: s1 [file s1]

# Supplementary Materials: Controlled and Local Delivery of Antibiotics by 3D Core/Shell Printed Hydrogel Scaffolds to Treat Soft Tissue Infections

Ashwini Rahul Akkineni, Janina Spangenberg, Michael Geissler, Saskia Reichelt, Hubert Buechner, Anja Lode and Michael Gelinsky

**Table S1.** Absolute release of various antibiotics from ALG-MC and ALG-MC-LAP scaffolds quantified by agar diffusion assay (using *S. aureus*) during the release study.

| Antibiotic Type | Time Point | Shell: ALG-MC<br>Average Amount of<br>Antibiotics Released<br>(mean $\pm$ standard<br>deviation) | Shell: ALG-MC-LAP<br>Average Amount of<br>Antibiotics Released<br>(mean $\pm$ standard<br>deviation) |
|-----------------|------------|--------------------------------------------------------------------------------------------------|------------------------------------------------------------------------------------------------------|
| Vancomycin      | 2h         | 68.30 $\pm$ 17.05                                                                                | 28.30 $\pm$ 2.02                                                                                     |
|                 | 6h         | 77.66 $\pm$ 21.18                                                                                | 23.16 $\pm$ 1.96                                                                                     |
|                 | 1d         | 87.90 $\pm$ 28.60                                                                                | 18.36 $\pm$ 0.38                                                                                     |
|                 | 2d         | 40.09 $\pm$ 11.64                                                                                | 19.63 $\pm$ 0.54                                                                                     |
|                 | 3d         | 26.28 $\pm$ 6.03                                                                                 | 18.26 $\pm$ 0.28                                                                                     |
|                 | 7d         | 15.90 $\pm$ 2.71                                                                                 | 14.93 $\pm$ 0.40                                                                                     |
| Clindamycin     | 2h         | 148.23 $\pm$ 18.34                                                                               | 28.42 $\pm$ 2.08                                                                                     |
|                 | 6h         | 52.37 $\pm$ 7.77                                                                                 | 27.48 $\pm$ 1.10                                                                                     |
|                 | 1d         | 14.71 $\pm$ 1.12                                                                                 | 26.82 $\pm$ 0.57                                                                                     |
|                 | 2d         | 5.04 $\pm$ 0.44                                                                                  | 26.28 $\pm$ 1.51                                                                                     |
|                 | 3d         | 1.91 $\pm$ 0.11                                                                                  | 26.17 $\pm$ 1.32                                                                                     |
|                 | 7d         | 1.03 $\pm$ 0.02                                                                                  | 26.86 $\pm$ 0.53                                                                                     |
| Gentamicin      | 2h         | 83.09 $\pm$ 2.05                                                                                 | 0 $\pm$ 0                                                                                            |
|                 | 6h         | 43.66 $\pm$ 2.04                                                                                 | 0 $\pm$ 0                                                                                            |
|                 | 1d         | 19.97 $\pm$ 1.31                                                                                 | 0 $\pm$ 0                                                                                            |
|                 | 2d         | 12.90 $\pm$ 0.48                                                                                 | 0 $\pm$ 0                                                                                            |
|                 | 3d         | 10.17 $\pm$ 0.70                                                                                 | 0 $\pm$ 0                                                                                            |
|                 | 7d         | 10.88 $\pm$ 1.10                                                                                 | 0 $\pm$ 0                                                                                            |

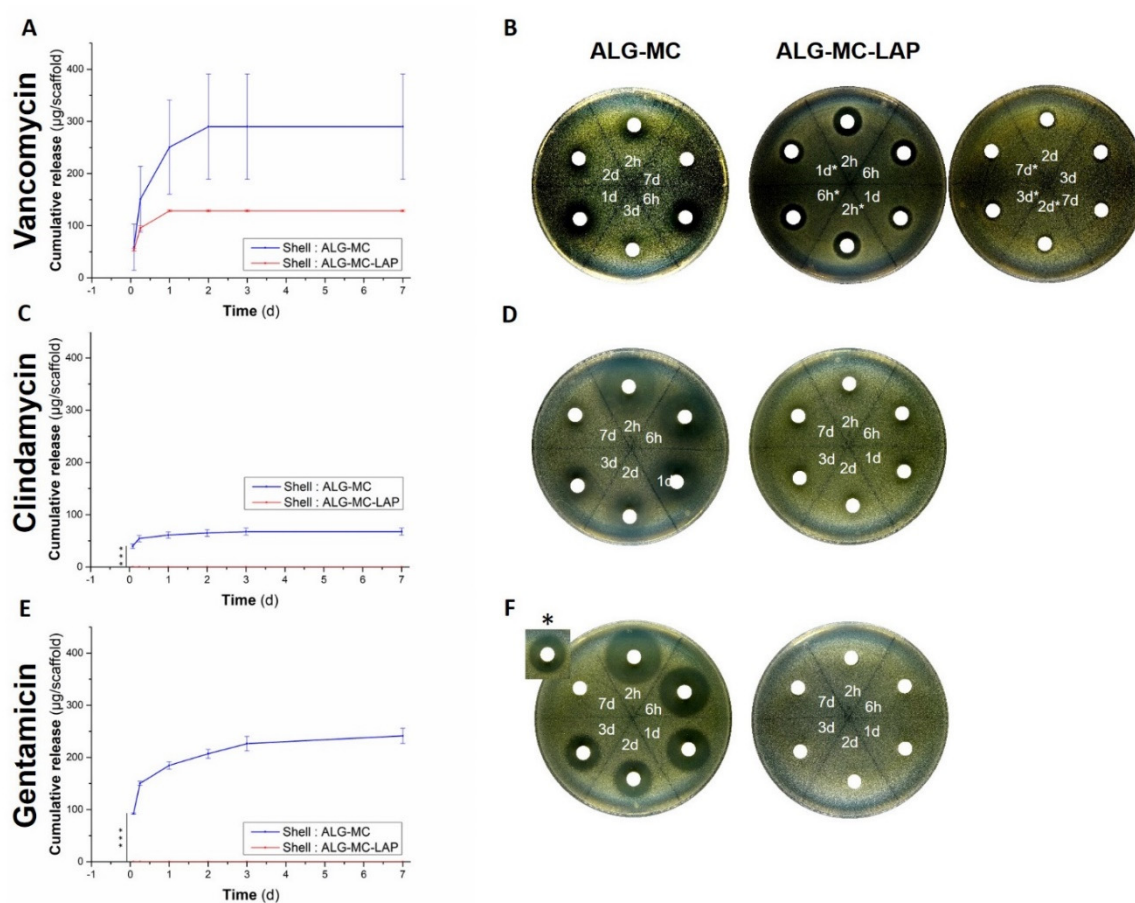

**Figure S1.** Release of antibiotics from C/S scaffolds; impact of shell biomaterial ink composition. Cumulative release of antibiotics loaded in ALG-MC and ALG-MC-LAP C/S scaffolds, quantified by agar diffusion assay (using *S. epidermidis* strain; **A**, **C** & **E**) over a period of 7 d (n=3), \*\*\*  $p < 0.001$ . Representative images of ZOI formed on the agar plate when release solutions were added to sample carriers (**B**, **D** & **F**). Two agar plates were used for release solutions obtained from vancomycin loaded ALG-MC/LAP scaffolds (**B**). A cropped image of ZOI of d 7 release sample of gentamicin loaded ALG-MC/LAP scaffolds was performed on a different agar plate and is added onto the ZOI of remaining samples (\* in **F**).

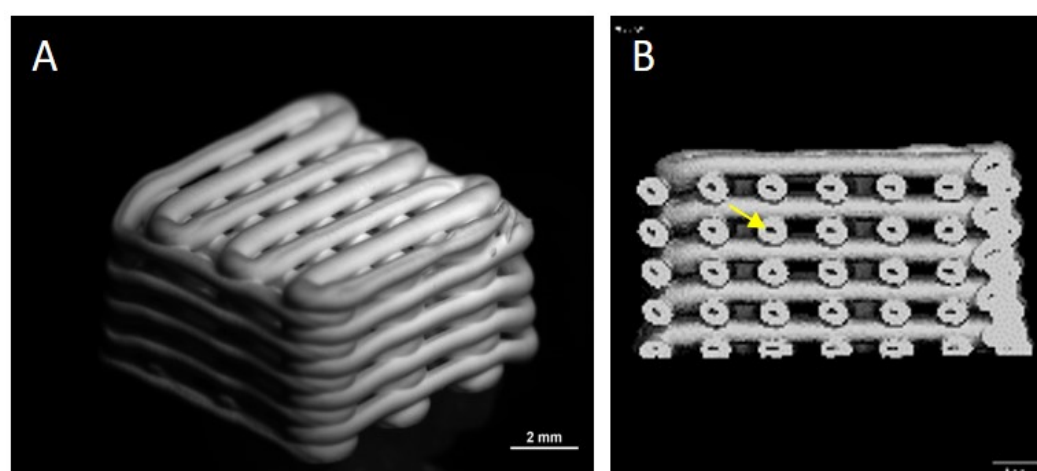

**Figure S2.** An image of a core/shell 3D printed calcium phosphate cement scaffold (**A**). Micro CT image of the scaffold showing the core/shell architecture of the strands (**B**); arrow indicating the hydrogel core of a strand. (visible as hollow lumen in µCT images).
